# Supplementary material for: Dialysis Patients Respond Adequately to Influenza Vaccination Irrespective of Dialysis Modality and Chronic Inflammation
Source: MDPI journal article supplement (doi:10.3390/jcm12196205), 2023-09-26
Supplement: s1 [file s1]

## RESPONSE H1N1

```
>
> r1<-
glm(ResponseH1N1~Group+Age+Gender+Diabetes+IL1+IL6+Monthsondialysis+HD
access+HDFvolume, family=binomial)
> summary(r1)
```

Call:

```
glm(formula = ResponseH1N1 ~ Group + Age + Gender + Diabetes +
     IL1 + IL6 + Monthsondialysis + HDaccess + HDFvolume, family =
     binomial)
```

Deviance Residuals:

| Min     | 1Q      | Median | 3Q     | Max    |
|---------|---------|--------|--------|--------|
| -1.6903 | -1.1744 | 0.8127 | 1.0662 | 1.3594 |

Coefficients:

|                  | Estimate   | Std. Error | z value | Pr(> z )     |
|------------------|------------|------------|---------|--------------|
| (Intercept)      | -3.010e+01 | 1.029e+03  | -0.029  | 0.9767       |
| GroupHD          | 1.581e+01  | 7.277e+02  | 0.022   | 0.9827       |
| GroupHDF         | 7.029e-01  | 7.456e-01  | 0.943   | 0.3458       |
| Age              | -1.544e-02 | 6.892e-03  | -2.240  | 0.0251 *     |
| GenderM          | -9.824e-02 | 1.999e-01  | -0.492  | 0.6230       |
| DiabetesY        | 8.929e-01  | 2.176e-01  | 4.103   | 4.09e-05 *** |
| IL1              | -5.314e-02 | 1.192e-01  | -0.446  | 0.6557       |
| IL6              | -1.206e-02 | 9.174e-03  | -1.315  | 0.1885       |
| Monthsondialysis | 4.758e-03  | 1.926e-03  | 2.470   | 0.0135 *     |
| HDaccessCVC      | 3.119e+01  | 1.029e+03  | 0.030   | 0.9758       |
| HDaccessFistula  | 3.093e+01  | 1.029e+03  | 0.030   | 0.9760       |
| HDaccessGraft    | 3.069e+01  | 1.029e+03  | 0.030   | 0.9762       |
| HDFvolume        | -3.090e-02 | 3.724e-02  | -0.830  | 0.4067       |

---  
Signif. codes: 0 '\*\*\*' 0.001 '\*\*' 0.01 '\*' 0.05 '.' 0.1 ' ' 1

(Dispersion parameter for binomial family taken to be 1)

Null deviance: 778.26 on 567 degrees of freedom  
Residual deviance: 738.85 on 555 degrees of freedom  
(188 observations deleted due to missingness)  
AIC: 764.85

Number of Fisher Scoring iterations: 14

```
> anova(r1,test="Chisq")
Analysis of Deviance Table
```

Model: binomial, link: logit

Response: ResponseH1N1

Terms added sequentially (first to last)

|                  | Df | Deviance | Resid. Df | Resid. Dev | Pr(>Chi)      |
|------------------|----|----------|-----------|------------|---------------|
| NULL             |    |          | 567       | 778.26     |               |
| Group            | 2  | 1.3661   | 565       | 776.90     | 0.5050816     |
| Age              | 1  | 2.0321   | 564       | 774.87     | 0.1540099     |
| Gender           | 1  | 0.8107   | 563       | 774.05     | 0.3679156     |
| Diabetes         | 1  | 12.5528  | 562       | 761.50     | 0.0003956 *** |
| IL1              | 1  | 1.2537   | 561       | 760.25     | 0.2628397     |
| IL6              | 1  | 1.2259   | 560       | 759.02     | 0.2682062     |
| Monthsondialysis | 1  | 5.9940   | 559       | 753.03     | 0.0143545 *   |
| HDaccess         | 3  | 13.4909  | 556       | 739.54     | 0.0036868 **  |
| HDFvolume        | 1  | 0.6912   | 555       | 738.85     | 0.4057405     |

Signif. codes: 0 '\*\*\*' 0.001 '\*\*' 0.01 '\*' 0.05 '.' 0.1 ' ' 1

>

### PROTECTION H1N1

> p1<-

```
glm(ProtectionH1N1~Group+Age+Gender+Time+Diabetes+IL1+IL6+Monthsondialysis+HDaccess+HDFvolume, family=binomial)
```

Warning message:

glm.fit: fitted probabilities numerically 0 or 1 occurred

> summary(p1)

Call:

```
glm(formula = ProtectionH1N1 ~ Group + Age + Gender + Time +  
    Diabetes + IL1 + IL6 + Monthsondialysis + HDaccess + HDFvolume,  
    family = binomial)
```

Deviance Residuals:

| Min      | 1Q      | Median  | 3Q      | Max     |
|----------|---------|---------|---------|---------|
| -2.37324 | 0.00000 | 0.00000 | 0.00006 | 1.09755 |

Coefficients:

|             | Estimate   | Std. Error | z value | Pr(> z ) |
|-------------|------------|------------|---------|----------|
| (Intercept) | 1.897e+00  | 6.029e+04  | 0.000   | 1.0000   |
| GroupHD     | 1.994e+01  | 3.115e+04  | 0.001   | 0.9995   |
| GroupHDF    | -6.960e+00 | 4.167e+00  | -1.670  | 0.0949 . |
| Age         | -9.348e-03 | 1.929e-02  | -0.485  | 0.6280   |
| GenderM     | 2.576e-01  | 5.348e-01  | 0.482   | 0.6300   |
| Time        | 1.902e+01  | 1.450e+03  | 0.013   | 0.9895   |
| DiabetesY   | -5.359e-01 | 5.484e-01  | -0.977  | 0.3285   |
| IL1         | 3.181e+00  | 3.436e+03  | 0.001   | 0.9993   |
| IL6         | 3.983e-02  | 3.011e-02  | 1.323   | 0.1860   |

|                  |            |           |       |        |
|------------------|------------|-----------|-------|--------|
| Monthsondialysis | 2.181e-05  | 4.483e-03 | 0.005 | 0.9961 |
| HDaccessCVC      | -2.939e-01 | 6.029e+04 | 0.000 | 1.0000 |
| HDaccessFistula  | 5.648e-01  | 6.029e+04 | 0.000 | 1.0000 |
| HDaccessGraft    | 6.864e-01  | 6.029e+04 | 0.000 | 1.0000 |
| HDFvolume        | 3.338e-01  | 2.242e-01 | 1.489 | 0.1365 |

---

Signif. codes: 0 '\*\*\*' 0.001 '\*\*' 0.01 '\*' 0.05 '.' 0.1 ' ' 1

(Dispersion parameter for binomial family taken to be 1)

Null deviance: 196.73 on 543 degrees of freedom  
 Residual deviance: 117.48 on 530 degrees of freedom  
 (212 observations deleted due to missingness)  
 AIC: 145.48

Number of Fisher Scoring iterations: 22

```
> anova(p1,test="Chisq")
Analysis of Deviance Table
```

Model: binomial, link: logit

Response: ProtectionH1N1

Terms added sequentially (first to last)

|                  | Df | Deviance | Resid. Df | Resid. Dev | Pr(>Chi)    |
|------------------|----|----------|-----------|------------|-------------|
| NULL             |    |          | 543       | 196.73     |             |
| Group            | 2  | 1.410    | 541       | 195.32     | 0.49416     |
| Age              | 1  | 0.610    | 540       | 194.71     | 0.43465     |
| Gender           | 1  | 0.204    | 539       | 194.50     | 0.65178     |
| Time             | 1  | 68.431   | 538       | 126.07     | < 2e-16 *** |
| Diabetes         | 1  | 0.558    | 537       | 125.52     | 0.45494     |
| IL1              | 1  | 0.463    | 536       | 125.05     | 0.49625     |
| IL6              | 1  | 1.666    | 535       | 123.39     | 0.19685     |
| Monthsondialysis | 1  | 0.006    | 534       | 123.38     | 0.94030     |
| HDaccess         | 3  | 2.119    | 531       | 121.26     | 0.54801     |
| HDFvolume        | 1  | 3.780    | 530       | 117.48     | 0.05186 .   |

---

Signif. codes: 0 '\*\*\*' 0.001 '\*\*' 0.01 '\*' 0.05 '.' 0.1 ' ' 1

=====

ResponseH3N2

```
> r2<-
glm(ResponseH3N2~Group+Age+Gender+Diabetes+IL1+IL6+Monthsondialysis+HD
```

```
access+HDFvolume, family=binomial)
> summary(r2)
```

Call:

```
glm(formula = ResponseH3N2 ~ Group + Age + Gender + Diabetes +
     IL1 + IL6 + Monthsondialysis + HDaccess + HDFvolume, family =
     binomial)
```

Deviance Residuals:

| Min     | 1Q      | Median  | 3Q     | Max    |
|---------|---------|---------|--------|--------|
| -1.4671 | -0.8570 | -0.6885 | 1.1544 | 2.0054 |

Coefficients:

|                  | Estimate   | Std. Error | z value | Pr(> z )     |
|------------------|------------|------------|---------|--------------|
| (Intercept)      | -8.835e-01 | 1.697e+03  | -0.001  | 0.999585     |
| GroupHD          | -1.678e+01 | 1.200e+03  | -0.014  | 0.988842     |
| GroupHDF         | 3.758e+00  | 1.375e+00  | 2.733   | 0.006270 **  |
| Age              | 7.418e-03  | 7.636e-03  | 0.971   | 0.331326     |
| GenderM          | -7.205e-01 | 2.223e-01  | -3.241  | 0.001192 **  |
| DiabetesY        | 2.515e-01  | 2.321e-01  | 1.083   | 0.278641     |
| IL1              | -2.846e+00 | 1.237e+02  | -0.023  | 0.981653     |
| IL6              | 3.553e-02  | 1.011e-02  | 3.516   | 0.000439 *** |
| Monthsondialysis | 1.655e-03  | 1.718e-03  | 0.964   | 0.335267     |
| HDaccessCVC      | -4.756e-01 | 1.697e+03  | 0.000   | 0.999776     |
| HDaccessFistula  | 1.855e-01  | 1.697e+03  | 0.000   | 0.999913     |
| HDaccessGraft    | -6.337e-01 | 1.697e+03  | 0.000   | 0.999702     |
| HDFvolume        | -2.241e-01 | 7.273e-02  | -3.081  | 0.002063 **  |

---

Signif. codes: 0 '\*\*\*' 0.001 '\*\*' 0.01 '\*' 0.05 '.' 0.1 ' ' 1

(Dispersion parameter for binomial family taken to be 1)

Null deviance: 696.63 on 567 degrees of freedom  
 Residual deviance: 634.61 on 555 degrees of freedom  
 (188 observations deleted due to missingness)  
 AIC: 660.61

Number of Fisher Scoring iterations: 15

```
> anova(r2,test="Chisq")
Analysis of Deviance Table
```

Model: binomial, link: logit

Response: ResponseH3N2

Terms added sequentially (first to last)

| Df | Deviance | Resid. Df | Resid. Dev | Pr(>Chi) |
|----|----------|-----------|------------|----------|
|----|----------|-----------|------------|----------|

|                  |   |         |     |        |               |
|------------------|---|---------|-----|--------|---------------|
| NULL             |   |         | 567 | 696.63 |               |
| Group            | 2 | 10.3133 | 565 | 686.32 | 0.0057610 **  |
| Age              | 1 | 1.2249  | 564 | 685.09 | 0.2684061     |
| Gender           | 1 | 6.4694  | 563 | 678.62 | 0.0109747 *   |
| Diabetes         | 1 | 0.0041  | 562 | 678.62 | 0.9491660     |
| IL1              | 1 | 5.3598  | 561 | 673.26 | 0.0206064 *   |
| IL6              | 1 | 11.7029 | 560 | 661.56 | 0.0006240 *** |
| Monthsondialysis | 1 | 1.3888  | 559 | 660.17 | 0.2386102     |
| HDaccess         | 3 | 11.6260 | 556 | 648.54 | 0.0087805 **  |
| HDFvolume        | 1 | 13.9346 | 555 | 634.61 | 0.0001893 *** |

---

Signif. codes: 0 '\*\*\*' 0.001 '\*\*' 0.01 '\*' 0.05 '.' 0.1 ' ' 1

>

=====

ProtectionH3N2

> p2<-

glm(ProtectionH3N2~Group+Age+Gender+Time+Diabetes+IL1+IL6+Monthsondialysis+HDaccess+HDFvolume, family=binomial)

> summary(p2)

Call:

glm(formula = ProtectionH3N2 ~ Group + Age + Gender + Time + Diabetes + IL1 + IL6 + Monthsondialysis + HDaccess + HDFvolume, family = binomial)

Deviance Residuals:

| Min     | 1Q     | Median | 3Q     | Max    |
|---------|--------|--------|--------|--------|
| -3.3553 | 0.0551 | 0.1533 | 0.3027 | 0.7938 |

Coefficients:

|                  | Estimate   | Std. Error | z value | Pr(> z )   |
|------------------|------------|------------|---------|------------|
| (Intercept)      | 5.701e+00  | 5.484e+03  | 0.001   | 0.99917    |
| GroupHD          | 1.562e+01  | 3.016e+03  | 0.005   | 0.99587    |
| GroupHDF         | -4.457e+00 | 3.980e+00  | -1.120  | 0.26270    |
| Age              | -4.010e-02 | 2.226e-02  | -1.802  | 0.07155 .  |
| GenderM          | -4.007e-02 | 5.973e-01  | -0.067  | 0.94651    |
| Time             | 7.601e-01  | 2.598e-01  | 2.926   | 0.00344 ** |
| DiabetesY        | 2.618e-01  | 6.227e-01  | 0.420   | 0.67423    |
| IL1              | 2.317e+00  | 3.333e+02  | 0.007   | 0.99445    |
| IL6              | -7.327e-03 | 2.511e-02  | -0.292  | 0.77044    |
| Monthsondialysis | 1.705e-03  | 5.022e-03  | 0.340   | 0.73414    |
| HDaccessCVC      | -3.581e-01 | 5.484e+03  | 0.000   | 0.99995    |
| HDaccessFistula  | -6.332e-01 | 5.484e+03  | 0.000   | 0.99991    |
| HDaccessGraft    | 4.361e-01  | 5.484e+03  | 0.000   | 0.99994    |
| HDFvolume        | 2.094e-01  | 2.161e-01  | 0.969   | 0.33252    |

---

Signif. codes: 0 '\*\*\*' 0.001 '\*\*' 0.01 '\*' 0.05 '.' 0.1 ' ' 1

(Dispersion parameter for binomial family taken to be 1)

Null deviance: 158.11 on 543 degrees of freedom  
Residual deviance: 131.23 on 530 degrees of freedom  
(212 observations deleted due to missingness)  
AIC: 159.23

Number of Fisher Scoring iterations: 17

```
> anova(p2, test="Chisq")  
Analysis of Deviance Table
```

Model: binomial, link: logit

Response: ProtectionH3N2

Terms added sequentially (first to last)

|                  | Df | Deviance | Resid. Df | Resid. Dev | Pr(>Chi)      |
|------------------|----|----------|-----------|------------|---------------|
| NULL             |    |          | 543       | 158.11     |               |
| Group            | 2  | 0.7198   | 541       | 157.39     | 0.69775       |
| Age              | 1  | 4.2721   | 540       | 153.12     | 0.03874 *     |
| Gender           | 1  | 0.1402   | 539       | 152.97     | 0.70813       |
| Time             | 1  | 17.7107  | 538       | 135.26     | 2.572e-05 *** |
| Diabetes         | 1  | 0.5260   | 537       | 134.74     | 0.46830       |
| IL1              | 1  | 0.1785   | 536       | 134.56     | 0.67266       |
| IL6              | 1  | 0.0550   | 535       | 134.50     | 0.81466       |
| Monthsondialysis | 1  | 0.1184   | 534       | 134.39     | 0.73075       |
| HDaccess         | 3  | 1.7046   | 531       | 132.68     | 0.63590       |
| HDFvolume        | 1  | 1.4518   | 530       | 131.23     | 0.22824       |

---

Signif. codes: 0 '\*\*\*' 0.001 '\*\*' 0.01 '\*' 0.05 '.' 0.1 ' ' 1

>

=====

=====

ResponseYamagata

>

> r3<-

```
glm(ResponseYamagata~Group+Age+Gender+Diabetes+IL1+IL6+Monthsondialysis+HDaccess+HDFvolume, family=binomial)
```

```
> summary(r3)
```

Call:

```
glm(formula = ResponseYamagata ~ Group + Age + Gender + Diabetes +  
      IL1 + IL6 + Monthsondialysis + HDaccess + HDFvolume, family =  
      binomial)
```

Deviance Residuals:

| Min     | 1Q      | Median | 3Q     | Max    |
|---------|---------|--------|--------|--------|
| -2.0729 | -1.2336 | 0.6961 | 0.8998 | 1.3713 |

Coefficients:

|                  | Estimate   | Std. Error | z value | Pr(> z )     |
|------------------|------------|------------|---------|--------------|
| (Intercept)      | -3.197e+01 | 1.029e+03  | -0.031  | 0.975214     |
| GroupHD          | 1.422e+01  | 7.277e+02  | 0.020   | 0.984412     |
| GroupHDF         | 2.375e-01  | 8.906e-01  | 0.267   | 0.789747     |
| Age              | -7.628e-04 | 7.371e-03  | -0.103  | 0.917572     |
| GenderM          | 5.297e-01  | 2.116e-01  | 2.503   | 0.012329 *   |
| DiabetesY        | 1.833e-01  | 2.291e-01  | 0.800   | 0.423597     |
| IL1              | -3.109e-01 | 1.353e-01  | -2.298  | 0.021565 *   |
| IL6              | 4.800e-02  | 1.295e-02  | 3.708   | 0.000209 *** |
| Monthsondialysis | 2.158e-03  | 2.056e-03  | 1.049   | 0.293977     |
| HDaccessCVC      | 3.212e+01  | 1.029e+03  | 0.031   | 0.975100     |
| HDaccessFistula  | 3.153e+01  | 1.029e+03  | 0.031   | 0.975557     |
| HDaccessGraft    | 3.147e+01  | 1.029e+03  | 0.031   | 0.975609     |
| HDFvolume        | 2.814e-02  | 4.495e-02  | 0.626   | 0.531344     |

---  
Signif. codes: 0 '\*\*\*' 0.001 '\*\*' 0.01 '\*' 0.05 '.' 0.1 ' ' 1

(Dispersion parameter for binomial family taken to be 1)

Null deviance: 726.72 on 567 degrees of freedom  
Residual deviance: 667.20 on 555 degrees of freedom  
(188 observations deleted due to missingness)  
AIC: 693.2

Number of Fisher Scoring iterations: 14

```
> anova(r3,test="Chisq")
Analysis of Deviance Table
```

Model: binomial, link: logit

Response: ResponseYamagata

Terms added sequentially (first to last)

|                  | Df | Deviance | Resid. Df | Resid. Dev | Pr(>Chi)      |
|------------------|----|----------|-----------|------------|---------------|
| NULL             |    |          | 567       | 726.72     |               |
| Group            | 2  | 12.9466  | 565       | 713.77     | 0.001544 **   |
| Age              | 1  | 1.3725   | 564       | 712.40     | 0.241382      |
| Gender           | 1  | 3.0761   | 563       | 709.33     | 0.079450 .    |
| Diabetes         | 1  | 1.0391   | 562       | 708.29     | 0.308036      |
| IL1              | 1  | 1.2519   | 561       | 707.03     | 0.263188      |
| IL6              | 1  | 19.4496  | 560       | 687.58     | 1.033e-05 *** |
| Monthsondialysis | 1  | 0.6668   | 559       | 686.92     | 0.414174      |
| HDaccess         | 3  | 19.3089  | 556       | 667.61     | 0.000236 ***  |

```
HDFvolume      1    0.4091      555      667.20  0.522420
---
Signif. codes:  0 '***' 0.001 '**' 0.01 '*' 0.05 '.' 0.1 ' ' 1
>
```

```
=====
=====
```

### ProtectionYamagata

```
>
> p3<-
glm(ProtectionYamagata~Group+Age+Gender+Time+Diabetes+IL1+IL6+Monthson
dialysis+HDaccess+HDFvolume, family=binomial)
Warning message:
glm.fit: fitted probabilities numerically 0 or 1 occurred
> summary(p3)
```

Call:

```
glm(formula = ProtectionYamagata ~ Group + Age + Gender + Time +
      Diabetes + IL1 + IL6 + Monthsondialysis + HDaccess + HDFvolume,
      family = binomial)
```

Deviance Residuals:

| Min      | 1Q      | Median  | 3Q      | Max     |
|----------|---------|---------|---------|---------|
| -2.59784 | 0.00000 | 0.00000 | 0.00007 | 1.14905 |

Coefficients:

|                  | Estimate   | Std. Error | z value | Pr(> z ) |
|------------------|------------|------------|---------|----------|
| (Intercept)      | 3.035e+00  | 6.062e+04  | 0.000   | 1.000    |
| GroupHD          | 2.003e+01  | 3.162e+04  | 0.001   | 0.999    |
| GroupHDF         | -3.344e-01 | 2.495e+00  | -0.134  | 0.893    |
| Age              | 1.306e-02  | 2.431e-02  | 0.537   | 0.591    |
| GenderM          | -1.700e-01 | 7.735e-01  | -0.220  | 0.826    |
| Time             | 1.805e+01  | 1.467e+03  | 0.012   | 0.990    |
| DiabetesY        | 1.153e+00  | 1.121e+00  | 1.028   | 0.304    |
| IL1              | 3.298e+00  | 3.481e+03  | 0.001   | 0.999    |
| IL6              | -3.197e-02 | 2.669e-02  | -1.198  | 0.231    |
| Monthsondialysis | -1.356e-03 | 5.217e-03  | -0.260  | 0.795    |
| HDaccessCVC      | -1.610e+00 | 6.062e+04  | 0.000   | 1.000    |
| HDaccessFistula  | -6.456e-01 | 6.062e+04  | 0.000   | 1.000    |
| HDaccessGraft    | -4.523e-01 | 6.062e+04  | 0.000   | 1.000    |
| HDFvolume        | -5.724e-03 | 1.229e-01  | -0.047  | 0.963    |

(Dispersion parameter for binomial family taken to be 1)

Null deviance: 99.742 on 543 degrees of freedom  
Residual deviance: 65.751 on 530 degrees of freedom  
(212 observations deleted due to missingness)



AIC: 93.751

Number of Fisher Scoring iterations: 22

```
> anova(p3,test="Chisq")
Analysis of Deviance Table
```

Model: binomial, link: logit

Response: ProtectionYamagata

Terms added sequentially (first to last)

|                  | Df | Deviance | Resid. Df | Resid. Dev | Pr(>Chi)      |
|------------------|----|----------|-----------|------------|---------------|
| NULL             |    |          | 543       | 99.742     |               |
| Group            | 2  | 0.7135   | 541       | 99.029     | 0.7000        |
| Age              | 1  | 0.2364   | 540       | 98.792     | 0.6268        |
| Gender           | 1  | 0.1276   | 539       | 98.665     | 0.7209        |
| Time             | 1  | 27.5418  | 538       | 71.123     | 1.537e-07 *** |
| Diabetes         | 1  | 1.6384   | 537       | 69.485     | 0.2005        |
| IL1              | 1  | 0.2169   | 536       | 69.268     | 0.6414        |
| IL6              | 1  | 2.3243   | 535       | 66.943     | 0.1274        |
| Monthsondialysis | 1  | 0.0101   | 534       | 66.933     | 0.9198        |
| HDaccess         | 3  | 1.1806   | 531       | 65.753     | 0.7577        |
| HDFvolume        | 1  | 0.0021   | 530       | 65.751     | 0.9631        |

---  
Signif. codes: 0 '\*\*\*' 0.001 '\*\*' 0.01 '\*' 0.05 '.' 0.1 ' ' 1

=====  
=====

ResponseVictolia

```
>
> r4<-
glm(ResponseVictolia~Group+Age+Gender+Diabetes+IL1+IL6+Monthsondialysi
s+HDaccess+HDFvolume, family=binomial)
> summary(r4)
```

Call:  
glm(formula = ResponseVictolia ~ Group + Age + Gender + Diabetes +  
IL1 + IL6 + Monthsondialysis + HDaccess + HDFvolume, family =  
binomial)

Deviance Residuals:

| Min     | 1Q      | Median | 3Q     | Max    |
|---------|---------|--------|--------|--------|
| -2.2292 | -1.2554 | 0.6478 | 0.9670 | 1.3123 |

Coefficients:

|                  | Estimate   | Std. Error | z value | Pr(> z )   |
|------------------|------------|------------|---------|------------|
| (Intercept)      | -2.930e+01 | 1.029e+03  | -0.028  | 0.97728    |
| GroupHD          | 1.391e+01  | 7.277e+02  | 0.019   | 0.98475    |
| GroupHDF         | -1.356e+00 | 8.960e-01  | -1.513  | 0.13019    |
| Age              | -4.502e-03 | 7.390e-03  | -0.609  | 0.54240    |
| GenderM          | 2.067e-02  | 2.145e-01  | 0.096   | 0.92320    |
| DiabetesY        | 6.519e-01  | 2.405e-01  | 2.711   | 0.00671 ** |
| IL1              | -1.836e-01 | 1.283e-01  | -1.431  | 0.15254    |
| IL6              | 1.296e-02  | 1.135e-02  | 1.142   | 0.25364    |
| Monthsondialysis | -3.830e-03 | 1.774e-03  | -2.159  | 0.03087 *  |
| HDaccessCVC      | 3.126e+01  | 1.029e+03  | 0.030   | 0.97577    |
| HDaccessFistula  | 2.995e+01  | 1.029e+03  | 0.029   | 0.97679    |
| HDaccessGraft    | 2.982e+01  | 1.029e+03  | 0.029   | 0.97689    |
| HDFvolume        | 8.660e-02  | 4.575e-02  | 1.893   | 0.05839 .  |

---

Signif. codes: 0 '\*\*\*' 0.001 '\*\*' 0.01 '\*' 0.05 '.' 0.1 ' ' 1

(Dispersion parameter for binomial family taken to be 1)

Null deviance: 726.72 on 567 degrees of freedom  
Residual deviance: 667.32 on 555 degrees of freedom  
(188 observations deleted due to missingness)  
AIC: 693.32

Number of Fisher Scoring iterations: 14

```
> anova(r4,test="Chisq")
Analysis of Deviance Table
```

Model: binomial, link: logit

Response: ResponseVictoria

Terms added sequentially (first to last)

|                  | Df | Deviance | Resid. Df | Resid. Dev | Pr(>Chi)      |
|------------------|----|----------|-----------|------------|---------------|
| NULL             |    |          | 567       | 726.72     |               |
| Group            | 2  | 1.2526   | 565       | 725.47     | 0.5345631     |
| Age              | 1  | 0.4932   | 564       | 724.97     | 0.4824906     |
| Gender           | 1  | 0.5441   | 563       | 724.43     | 0.4607591     |
| Diabetes         | 1  | 12.1634  | 562       | 712.27     | 0.0004874 *** |
| IL1              | 1  | 1.9612   | 561       | 710.31     | 0.1613798     |
| IL6              | 1  | 1.4744   | 560       | 708.83     | 0.2246455     |
| Monthsondialysis | 1  | 8.1302   | 559       | 700.70     | 0.0043533 **  |
| HDaccess         | 3  | 29.2565  | 556       | 671.45     | 1.978e-06 *** |
| HDFvolume        | 1  | 4.1241   | 555       | 667.32     | 0.0422757 *   |

---

Signif. codes: 0 '\*\*\*' 0.001 '\*\*' 0.01 '\*' 0.05 '.' 0.1 ' ' 1

>

```
=====
=====
ProtectionVictoria
```

```
>
> p4<-
glm(ProtectionVictoria~Group+Age+Gender+Time+Diabetes+IL1+IL6+Monthson
dialysis+HDaccess+HDFvolume, family=binomial)
Warning message:
glm.fit: fitted probabilities numerically 0 or 1 occurred
> summary(p4)
```

```
Call:
glm(formula = ProtectionVictoria ~ Group + Age + Gender + Time +
    Diabetes + IL1 + IL6 + Monthsondialysis + HDaccess + HDFvolume,
    family = binomial)
```

Deviance Residuals:

|  | Min      | 1Q      | Median  | 3Q      | Max     |
|--|----------|---------|---------|---------|---------|
|  | -2.71841 | 0.00000 | 0.00000 | 0.00007 | 0.85620 |

Coefficients:

|                  | Estimate   | Std. Error | z      | value  | Pr(> z ) |
|------------------|------------|------------|--------|--------|----------|
| (Intercept)      | 4.493e+00  | 6.061e+04  | 0.000  | 0.9999 |          |
| GroupHD          | 1.914e+01  | 3.155e+04  | 0.001  | 0.9995 |          |
| GroupHDF         | 1.647e+00  | 2.123e+00  | 0.776  | 0.4380 |          |
| Age              | 2.253e-03  | 2.386e-02  | 0.094  | 0.9248 |          |
| GenderM          | 2.152e-01  | 6.985e-01  | 0.308  | 0.7580 |          |
| Time             | 1.822e+01  | 1.481e+03  | 0.012  | 0.9902 |          |
| DiabetesY        | 1.707e-01  | 7.592e-01  | 0.225  | 0.8221 |          |
| IL1              | 3.653e+00  | 3.445e+03  | 0.001  | 0.9992 |          |
| IL6              | -4.626e-02 | 2.749e-02  | -1.683 | 0.0924 | .        |
| Monthsondialysis | 2.681e-03  | 6.571e-03  | 0.408  | 0.6833 |          |
| HDaccessCVC      | -1.164e+00 | 6.061e+04  | 0.000  | 1.0000 |          |
| HDaccessFistula  | -2.516e+00 | 6.061e+04  | 0.000  | 1.0000 |          |
| HDaccessGraft    | -2.202e+00 | 6.061e+04  | 0.000  | 1.0000 |          |
| HDFvolume        | -7.859e-02 | 9.997e-02  | -0.786 | 0.4318 |          |

```
---
Signif. codes:  0 '***' 0.001 '**' 0.01 '*' 0.05 '.' 0.1 ' ' 1
```

(Dispersion parameter for binomial family taken to be 1)

Null deviance: 115.270 on 543 degrees of freedom  
Residual deviance: 77.448 on 530 degrees of freedom  
(212 observations deleted due to missingness)  
AIC: 105.45

Number of Fisher Scoring iterations: 22

```
> anova(p4,test="Chisq")
Analysis of Deviance Table
```

```
Model: binomial, link: logit
```

```
Response: ProtectionVictoria
```

```
Terms added sequentially (first to last)
```

|                  | Df | Deviance | Resid. Df | Resid. Dev | Pr(>Chi)      |
|------------------|----|----------|-----------|------------|---------------|
| NULL             |    |          | 543       | 115.270    |               |
| Group            | 2  | 0.273    | 541       | 114.997    | 0.8722        |
| Age              | 1  | 0.062    | 540       | 114.935    | 0.8040        |
| Gender           | 1  | 0.000    | 539       | 114.935    | 0.9830        |
| Time             | 1  | 33.094   | 538       | 81.841     | 8.783e-09 *** |
| Diabetes         | 1  | 0.039    | 537       | 81.803     | 0.8439        |
| IL1              | 1  | 0.386    | 536       | 81.417     | 0.5345        |
| IL6              | 1  | 1.798    | 535       | 79.619     | 0.1799        |
| Monthsondialysis | 1  | 0.101    | 534       | 79.518     | 0.7510        |
| HDaccess         | 3  | 1.515    | 531       | 78.003     | 0.6787        |
| HDFvolume        | 1  | 0.555    | 530       | 77.448     | 0.4563        |

```
---
```

```
Signif. codes:  0 '***' 0.001 '**' 0.01 '*' 0.05 '.' 0.1 ' ' 1
```
